# Supplementary material for: Optimizing dielectric, mechanical, and thermal properties of epoxy resin through molecular design for multifunctional performance
Source: Royal Society of Chemistry journal article supplement (doi:10.1039/d4mh01414f), 2024-12-02
Supplement: d4mh01414f1.pdf [file d4mh01414f1.pdf]

1 **Optimizing Dielectric, Mechanical, and Thermal Properties of**  
2 **Epoxy Resin through Molecular Design for Multifunctional**  
3 **Performance**

4

5 Yuheng Deng<sup>a</sup>, Yen Wen Wong<sup>a</sup>, Letitia Kai Yue Teh<sup>a</sup>, Qi Wang<sup>b</sup>, Weifeng Sun<sup>b</sup>, Wen  
6 Kwang Chern<sup>b,c</sup>, Joo Tien Oh<sup>a</sup>, Zhong Chen<sup>a,b,\*</sup>

7

8 <sup>a</sup> School of Materials Science and Engineering, Nanyang Technological University, 50  
9 Nanyang Avenue, 639798, Singapore.

10 <sup>b</sup> SP Group – NTU Joint Laboratory, School of Electrical and Electronic Engineering,  
11 Nanyang Technological University, 50 Nanyang Avenue, 639798, Singapore.

12 <sup>c</sup> Singapore Power Group, 349277, Singapore.

13

14 Corresponding Author:

15 \*Zhong Chen

16 Email: [aszchen@ntu.edu.sg](mailto:aszchen@ntu.edu.sg)

17 Tel: +(65) 6790 4256

18

19 **1 Structure of epoxy resin**

20 In this study, the amine/epoxy resin system consisting of resin solution (ARALDITE®  
21 LY 5052) and amine hardener (ARADUR® 5052 CH) are used. The curing reaction in  
22 this system, along with the resulting crosslinked polymer network<sup>1,2</sup>, is illustrated in  
23 **Figure S1**.

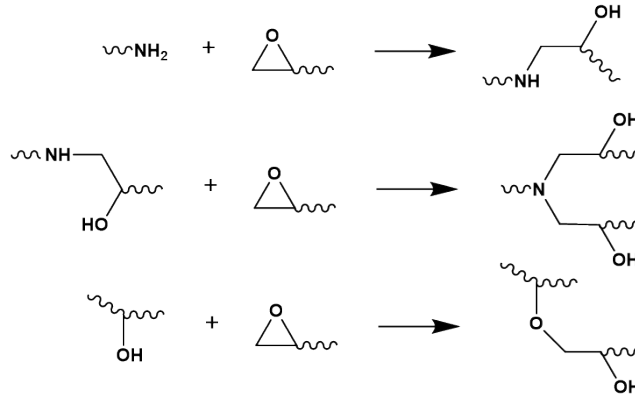

25 **Figure S1.** Main reaction between epoxy resin and hardener used in this study.

26

27 **2 Dimensions of tensile specimens.**

28 The tensile measurement was conducted based on ASTM D638 test standard<sup>3</sup>. The  
29 dimension of the specimen is described as Type V in this standard:

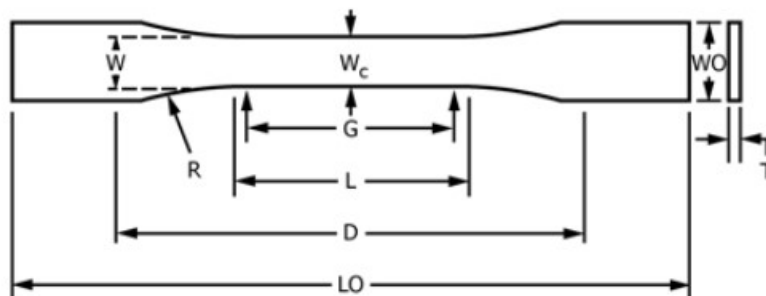

31 **Figure S2.** Dimensions of tensile testing samples

32

33 **Table S1.** Dimensions of tensile testing samples

| <b>Dimensions (see drawing)</b> | <b>Specimen dimensions (mm)</b> |
|---------------------------------|---------------------------------|
| W—Width of the narrow section   | 3.18                            |
| L—Length of the narrow section  | 9.53                            |
| WO—Width overall                | 9.53                            |
| LO—Length overall               | 63.5                            |
| G—Gage length                   | 7.62                            |
| D—Distance between grips        | 25.4                            |
| R—Radius of fillet              | 12.7                            |

34

35 **3 Curing behavior of modified EP**

36 The DSC curves for all uncured and cured modified EP with 1.5 wt.% modifier  
 37 concentration are illustrated in **Figure S3**, illustrated complete curing for all modified EP  
 38 using the given curing conditions in this study.

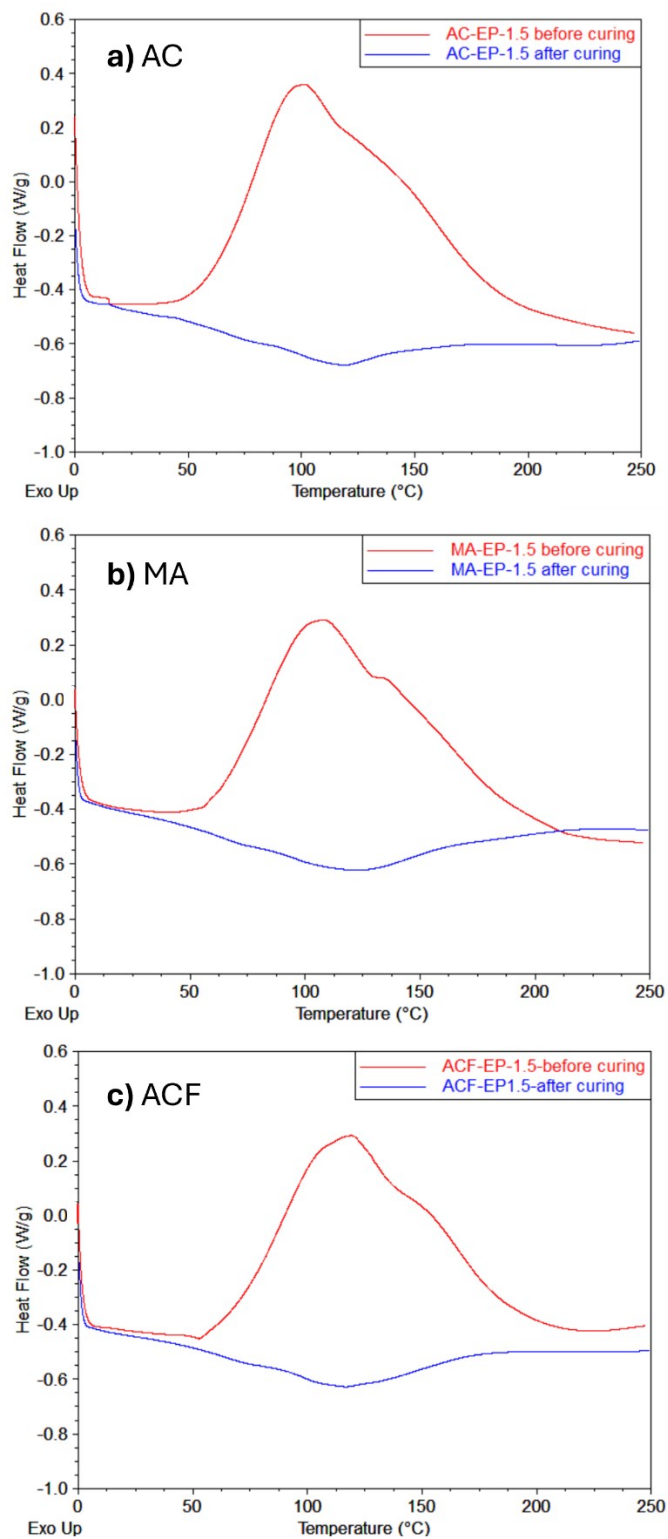

39

40 **Figure S3.** DSC curves for uncured and cured (a) EP-AC-1.5, (b) EP-MA-1.5, and (c) EP-ACF-

41

1.5.

42

#### 43 4 Heat released in curing process of EP-MA

44 The curing process was investigated by differential scanning calorimetry (DSC). The  
45 exothermic peak can be observed in the curing process, as shown in **Figure S4**. As the  
46 concentration of MA increases, the heat of curing decreases from 432 J/g (EP-MA-0.5)  
47 to 409 J/g (EP-MA-1.0) and to 340 J/g (EP-MA-1.5), indicating reduced crosslinking due  
48 to excess modifier.

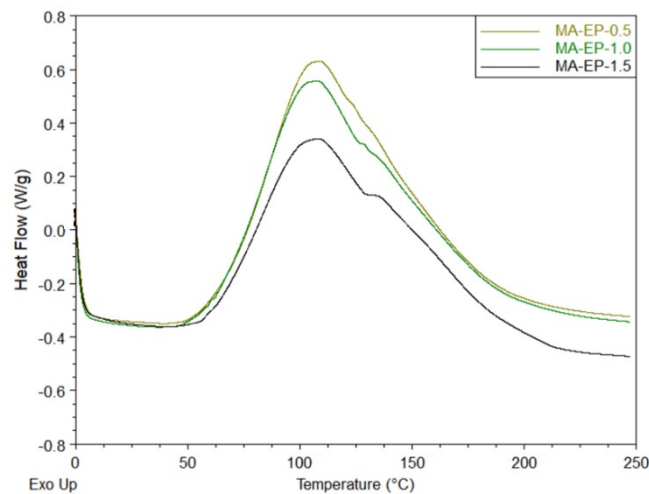

49

50 **Figure S4.** Exothermic peaks in curing process for EP-MA with various modifier  
51 concentrations.

52

#### 53 5 First principles calculation for charge trap in EP-MA

54 First principles calculations indicate that MA introduces deep hole traps at 1.3 eV in the  
55 modified EP, as illustrated in **Figure S5**.

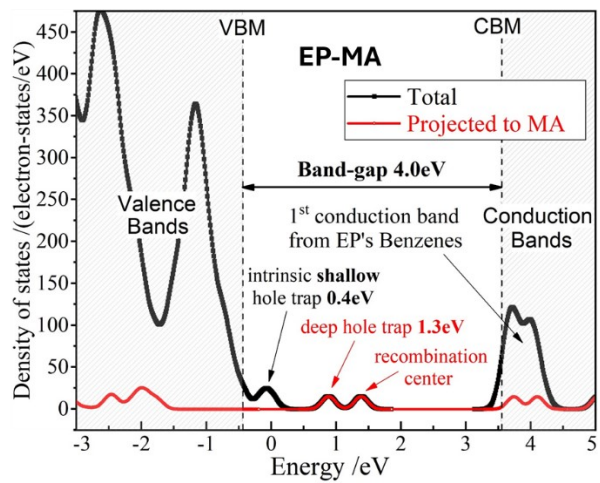

56

57 **Figure S5.** Density of electron states for EP-MA calculated through first-principal.

58

59 **Reference**

- 60 1 R. Ramsdale-Capper and J. P. Foreman, *Polymer*, 2018, **146**, 321–330.  
61 2 J. P. Bell, *Journal of Polymer Science Part A-2: Polymer Physics*, 1970, **8**, 417–436.  
62 3 D20 Committee, *Test Method for Tensile Properties of Plastics*, ASTM International.  
63
